# Supplementary material for: The multi-sectorial emergency response to a cholera outbreak in Internally Displaced Persons camps in Borno State, Nigeria, 2017
Source: PubMed Central journal article supplement (PMC7042583; doi:10.1136/bmjgh-2019-002000), 2020-01-28

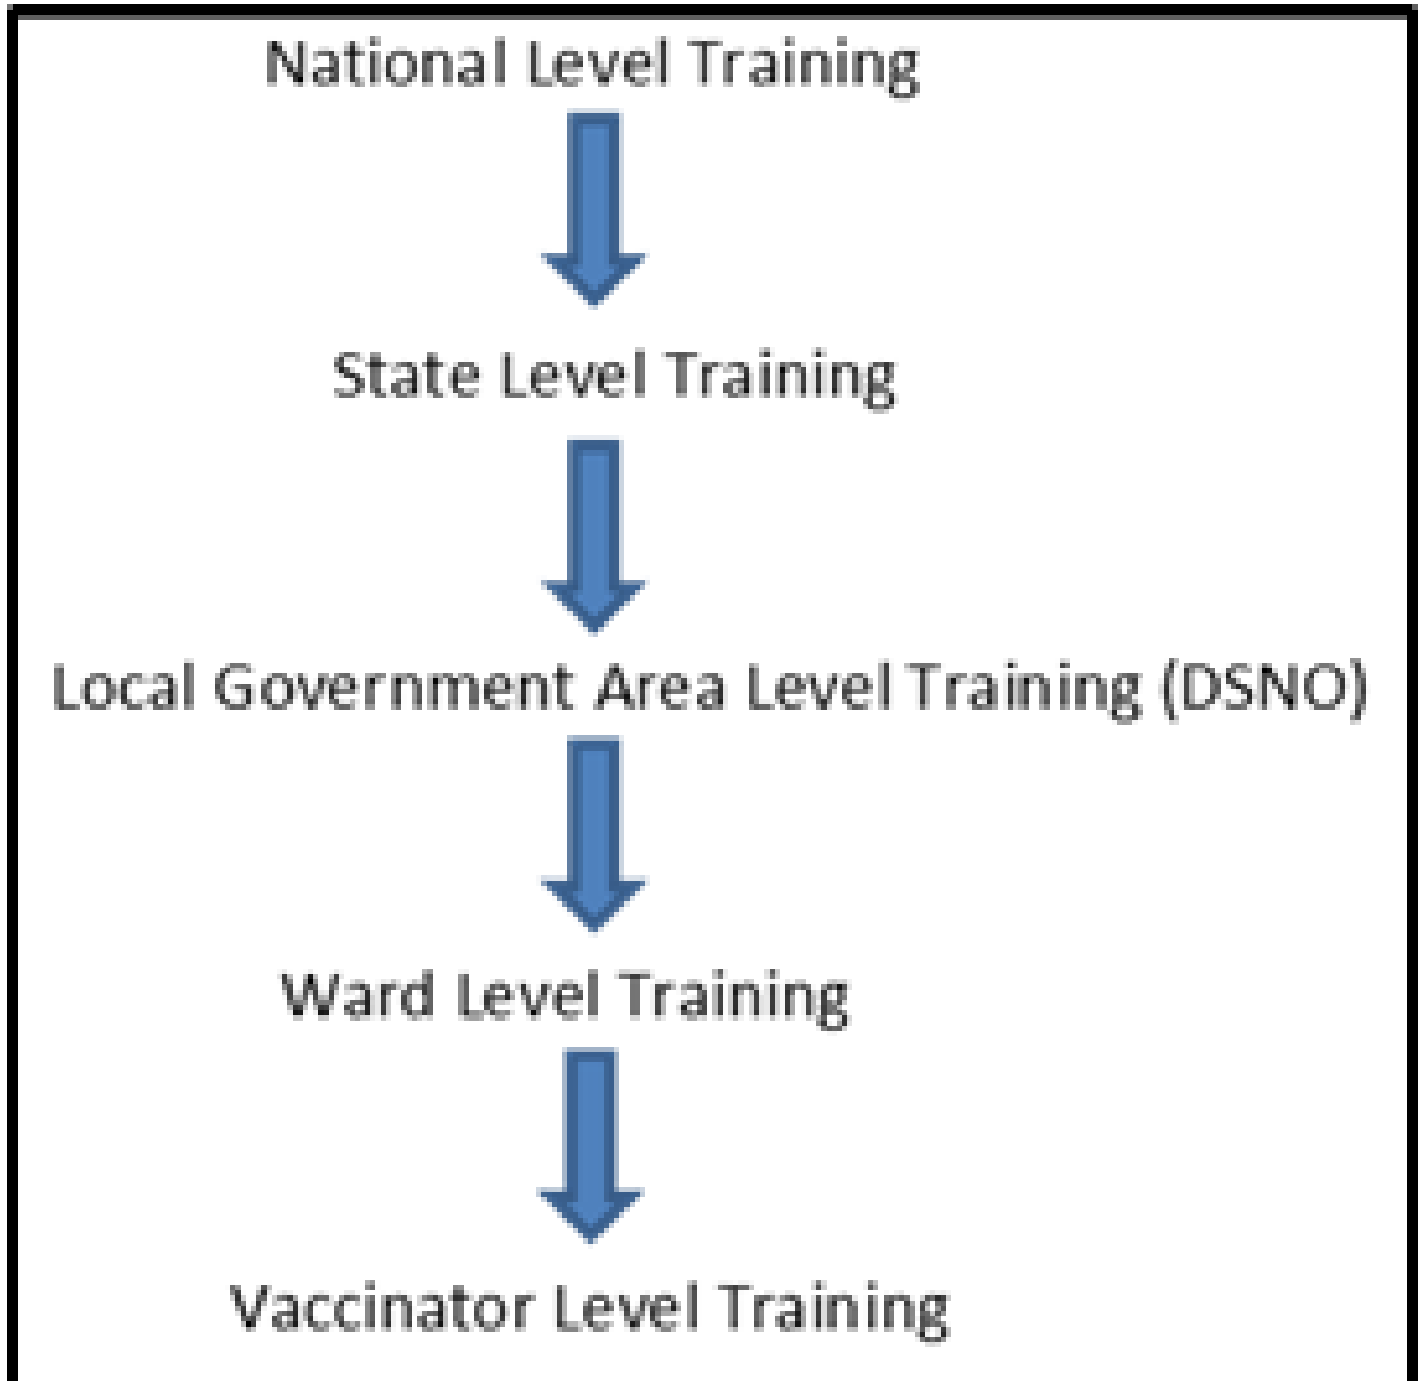

Supplement: bmjgh-2019-002000supp002.pdf [file bmjgh-2019-002000supp002.pdf]
